# Supplementary material for: Ruxolitinib Cream 1.5%: A Review in Mild to Moderate Atopic Dermatitis
Source: PubMed Central journal article supplement — Am J Clin Dermatol. 2022 Dec 20;24(1):143–51. doi: 10.1007/s40257-022-00748-2 (PMC10036407; doi:10.1007/s40257-022-00748-2), 2022-12-20
Supplement: 40257_2022_748_MOESM1_ESM.pdf [file 40257_2022_748_MOESM1_ESM.pdf]

## Ruxolitinib Cream 1.5%: Adis Evaluation

### Clinical Considerations

- First topical Janus kinase (JAK) inhibitor approved in the USA
- Provides early and sustained improvements in disease severity, pruritus and sleep disturbance measures when applied twice daily over the short term
- Controls disease severity measures when applied as needed to active lesions over the longer term
- Safety profile similar to that of vehicle cream; no safety findings suggestive of systemic JAK inhibition

### Plain Language Summary

#### *Background and rationale*

- Atopic dermatitis (AD; also known as atopic eczema) is a chronic, relapsing, inflammatory skin disease that most commonly occurs in children but may also affect adults
- Ruxolitinib cream 1.5% (OPZELURA™) is a topical therapy that inhibits JAK1 and JAK2, which are enzymes that can modify the inflammatory pathways involved in AD. It is approved in the USA for short-term and non-continuous longer-term treatment of mild to moderate AD in non-immunocompromised patients aged ≥ 12 years whose disease is not adequately controlled with topical prescription therapies or when those therapies are not advisable

#### *Clinical findings*

- Patients experienced clearer skin and a reduction in itch and disturbed sleep when treated with ruxolitinib cream 1.5% twice daily compared with a non-medicated cream for 8 weeks. Moreover, clearer skin was maintained for a further 44 weeks when using the treatment as needed
- The safety profile of ruxolitinib cream 1.5% was similar to that of the non-medicated cream, and stinging/burning sensations following application were infrequent

#### *Conclusion*

Ruxolitinib cream 1.5% offers an alternative to established topical agents (e.g. corticosteroids and calcineurin inhibitors) for the treatment of adults and adolescents with mild to moderate AD.

This plain language summary represents the opinions of the author. For a full list of declarations, including funding and author disclosure statements, and copyright information, please see the full text online. © Springer Nature Switzerland AG 2022.
